# Supplementary material for: Real-time individual identification and recognition of Khorat snail-eating turtle Malayemys khoratensis using directional weight YOLOv8 for characteristic patterns finding
Source: PeerJ journal article supplement (doi:10.7717/peerj-cs.3413), 2025-11-27
Supplement: README.docx [file README.docx]

**Reproducibility**

Algorithms and code used to implement as follows,

**Data Preparation and Pre-processing**

Download Data for code:  <https://github.com/wararatkku/PeerJAITurtleRecognitionDataset.git>

For each pattern, please label the image and install

- Download git: <https://github.com/PiyalGeorge/LabelImg>
- Download and setup [Python 2.6 or later](https://www.python.org/downloads/windows/), [PyQt4](https://www.riverbankcomputing.com/software/pyqt/download) and [install lxml](http://lxml.de/installation.html).
- Open cmd and go to the [labelImg](https://github.com/PiyalGeorge/LabelImg" \l "labelimg) directory
- pyrcc4 -o resources.py resources.qrc
- python labelImg.py and then pop-up screen for label image

get image folder and each image to tag rectangle label and imagexxx.txt file

**Check file before run model**

- image folder
- label folder
- xxx.yaml
- xxx.pt (best model)

**Computing infrastructure** (OS: Windows11, 11th Gen Intel(R) Core(TM) i5-1135G7 @ 2.40GHz 2.42 GHz, Ram 16 GB)

**Code:**

Run python code and models file in google colab as attach file.

code file name: [10.5281/zenodo.15852965](https://doi.org/10.5281/zenodo.15852965) as [directional_weight_yolov8_turtle.ipynb](https://github.com/wararatkku/PeerJAITurtleRecognitionDataset/blob/main/directional_weight_yolov8_turtle.ipynb)
